# Supplementary material for: Has intravenous lidocaine improved the outcome in horses following surgical management of small intestinal lesions in a UK hospital population?
Source: PubMed Central journal article supplement (PMC4962447; doi:10.1186/s12917-016-0784-7), 2016-07-27
Supplement: 12917_2016_784_MOESM1_ESM.pdf [file 12917_2016_784_MOESM1_ESM.pdf]

# Colic Admission Form

CASE LABEL HERE

|                |  |
|----------------|--|
| Admission Date |  |
| Admission Time |  |

Please circle answers as appropriate. If an answer is unknown, please leave the field blank.

| Premises Details |  |           |  |
|------------------|--|-----------|--|
| Yard Name        |  | Post Code |  |
| Address          |  |           |  |

| Signalment                                             |                                                                                       |           |        |                   |    |        |  |    |
|--------------------------------------------------------|---------------------------------------------------------------------------------------|-----------|--------|-------------------|----|--------|--|----|
| Gender                                                 | Gelding / Mare / Stallion                                                             | Pregnant? | Y / N  | Days of Gestation |    | days   |  |    |
| <i>If female:</i>                                      |                                                                                       | Nursing?  | Y / N  | Age of Foal       |    | months |  |    |
| Breed                                                  | TB / TBX / WB / Cob / Welsh / Shetland / Miniature / Draft / Arab / ID / IDX / Other: |           |        |                   |    |        |  |    |
| Age                                                    |                                                                                       | years     | Weight |                   | Kg | Height |  | hh |
| How long has the horse been in the owner's possession? |                                                                                       |           |        | years             |    | months |  |    |

| General History                      |                                                                                                                                                |                       |                   |                                 |
|--------------------------------------|------------------------------------------------------------------------------------------------------------------------------------------------|-----------------------|-------------------|---------------------------------|
| Type of Work                         | General Riding / Racing / Eventing / SJ / Breeding / Dressage / Retired / Other:                                                               |                       |                   |                                 |
| Level of Work                        |                                                                                                                                                | hours/week            | Intensity of Work | None / Light / Medium / Intense |
| Management                           | Private Stable / Livery Yard / Racing Yard / Professional Yard / Other:                                                                        |                       |                   |                                 |
| Currently Stabled?                   | Y / N                                                                                                                                          | Hours Stabled Per Day |                   | hours                           |
| Main Carer                           | Owner / Private Groom / Professional Yard Staff / Loaner / Other:                                                                              |                       |                   |                                 |
| Number of Carers During Last 2 Weeks |                                                                                                                                                |                       |                   |                                 |
| Other Horses at the Property?        | Y / N                                                                                                                                          | If so, how many?      |                   |                                 |
| Stereotypic Behaviour                | None / Wind Sucking / Weaving / Box Walking / Crib Biting                                                                                      |                       |                   |                                 |
| Bedding                              | Shavings / Straw / Paper / At grass / Pellets / Hemp / Other:                                                                                  |                       |                   |                                 |
| Forage                               | Hay / Soaked Hay / Haylage / Grass / Silage Other:                                                                                             |                       |                   |                                 |
| Forage Frequency                     |                                                                                                                                                | times per day         |                   |                                 |
| Hard Feed                            | None / Coarse Mix / Pellets/Cubes / Oats / Bran / Barley / Sugar Beet / Corn / Carrot / Mash / Alfa Alfa / Apple / Grass nuts / Chaff / Other: |                       |                   |                                 |
| Hard Feed Frequency                  |                                                                                                                                                | times per day         |                   |                                 |
| Supplements Given?                   | Y / N                                                                                                                                          |                       |                   |                                 |
| Supplements Details                  |                                                                                                                                                |                       |                   |                                 |

| Worming History                              |                                                                             |       |
|----------------------------------------------|-----------------------------------------------------------------------------|-------|
| Worming Strategy                             | Every 6-12 weeks / Every 13 weeks - 6 months / Every 6-12 months / Targeted |       |
| Weeks Since Last Worming                     |                                                                             | weeks |
| Last Worming Product Used                    |                                                                             |       |
| Faecal Egg Count Performed in Last 6 Months? | Y / N                                                                       |       |
| <i>If yes: Faecal Egg Count Result</i>       | Normal / Abnormal                                                           |       |
| Tapeworm ELISA Performed in Last 6 Months?   | Y / N                                                                       |       |
| <i>If yes: Tapeworm ELISA Result</i>         | Normal / Abnormal                                                           |       |

Please circle answers as appropriate. If an answer is unknown, please leave the field blank.

| <b>Dental Care</b>                     |                                                       |
|----------------------------------------|-------------------------------------------------------|
| <b>Is There a Dental Care Routine?</b> | Y / N                                                 |
| <b>Dentist</b>                         | Vet / Dental Technician / Other: <input type="text"/> |
| <b>Dental Care Frequency</b>           | 6 monthly / 12 monthly / More than 12 monthly         |
| <b>Light Source Used?</b>              | Y / N                                                 |
| <b>Mouth Gag Used?</b>                 | Y / N                                                 |
| <b>Known Dental Problems?</b>          | Y / N                                                 |
| <i>If yes: Please Give Details</i>     | <input type="text"/>                                  |

| <b>Changes In The Past 30 Days</b> |                                                                                                                                                                            |
|------------------------------------|----------------------------------------------------------------------------------------------------------------------------------------------------------------------------|
| <b>Changes In Feeding?</b>         | Y / N                                                                                                                                                                      |
| <i>If yes: Type of Change</i>      | Hard feed introduction / Change hard feed type / Change forage type / Change forage source / Supplement introduction / Change supplements / Other:<br><input type="text"/> |

|                                     |                                                                                                             |
|-------------------------------------|-------------------------------------------------------------------------------------------------------------|
| <b>Changes In Stabling/Turnout?</b> | Y / N                                                                                                       |
| <i>If yes: Type of Change</i>       | Decrease in turn-out / Increase in turn-out / Change of pasture / Box rest / Other:<br><input type="text"/> |

|                                          |                            |
|------------------------------------------|----------------------------|
| <b>Transportation?</b>                   | Y / N                      |
| <i>If yes: Transportation Duration</i>   | <input type="text"/> hours |
| <i>If yes: Days Since Transportation</i> | <input type="text"/> days  |

|                                           |                                                                                                          |
|-------------------------------------------|----------------------------------------------------------------------------------------------------------|
| <b>Medical Problems Other Than Colic?</b> | Y / N                                                                                                    |
| <i>If yes: Other Medical Problems</i>     | Diarrhoea / Fever / Laminitis / Respiratory / Lameness / Urinary infection / Other: <input type="text"/> |

|                                          |                                                                                                          |
|------------------------------------------|----------------------------------------------------------------------------------------------------------|
| <b>Medications Received?</b>             | Y / N                                                                                                    |
| <i>If yes: What Medications Received</i> | Sedation / Anthelmintic / NSAID / Corticosteroids / Buscopan / Antibiotics / Other: <input type="text"/> |

| <b>Other History</b>                                         |                      |
|--------------------------------------------------------------|----------------------|
| <b>Number of Previous Colic Episodes in Past 12 Months:</b>  | <input type="text"/> |
| <b>Did a Vet Attend?</b>                                     | Y / N                |
| <b>Previous Colic Surgery?</b>                               | Y / N                |
| <i>If yes: Details of Previous Colic Surgery (e.g. Date)</i> | <input type="text"/> |
| <i>If yes: Diagnosis</i>                                     | <input type="text"/> |
| <b>Non-Abdominal Surgery in Past 6 Months?</b>               | Y / N                |
| <i>If yes: Details of Non-Abdominal Surgery (e.g. Date)</i>  | <input type="text"/> |

Please circle answers as appropriate. If an answer is unknown, please leave the field blank.

| Current Colic History                                                             |                                                                                                                                                                                     |  |      |
|-----------------------------------------------------------------------------------|-------------------------------------------------------------------------------------------------------------------------------------------------------------------------------------|--|------|
| When was the horse last seen to be normal?                                        | Date                                                                                                                                                                                |  | Time |
| When was the colic first observed?                                                | Date                                                                                                                                                                                |  | Time |
| Signs of Colic                                                                    | Rolling / Muscle tremors / Trouble swallowing / Sweating / Teeth grinding / Flank watching / Pawing ground / Getting up and down / Kicking belly / Lying still / Crouching / Other: |  |      |
|                                                                                   |                                                                                                                                                                                     |  |      |
| Owner's Perception of Pain Severity (ask owner to mark a cross on the line below) |                                                                                                                                                                                     |  |      |
| Pain free = 0 _____ 10 = Severe pain                                              |                                                                                                                                                                                     |  |      |
| Number of Vet Visits                                                              |                                                                                                                                                                                     |  |      |
| Drugs Administered                                                                | Flunixin / Phenylbutazone / Other NSAIDS / Alpha 2 / Butorphanol / Mineral Oil / Buscopan / Other:                                                                                  |  |      |
| Response to Treatment                                                             | None / Improved / Deteriorated                                                                                                                                                      |  |      |

| Clinical Examination                           |                                                                         |      |          |      |     |          |
|------------------------------------------------|-------------------------------------------------------------------------|------|----------|------|-----|----------|
| Attitude                                       | Normal / Painful / Quiet / Unwilling to move                            |      |          |      |     |          |
| Pain Severity (mark a cross on the line below) |                                                                         |      |          |      |     |          |
| Pain free = 0 _____ 10 = Severe pain           |                                                                         |      |          |      |     |          |
| Body Condition Score                           | 1                                                                       | 2    | 3        | 4    | 5   | 6        |
|                                                | Very Poor                                                               | Poor | Moderate | Good | Fat | Very Fat |
| Other Signs                                    | Salivation / Muscle fasciculations / Poor tail tone / Sweating / Other: |      |          |      |     |          |
| Cleanliness of the Horse                       | Clean clipped / Clean unclipped / Moderate / Filthy                     |      |          |      |     |          |

| Cardiovascular System |                                                  |           |     |                  |                          |             |               |
|-----------------------|--------------------------------------------------|-----------|-----|------------------|--------------------------|-------------|---------------|
| Heart Rate            |                                                  | beats/min |     | Pulse Quality    | Normal / Weak / Bounding |             |               |
| Mucous Membranes      | Normal / Congested / Cyanotic / Pale / Jaundiced |           |     |                  |                          |             |               |
| CRT                   |                                                  | secs.     | PCV |                  | %                        | TP          |               |
|                       |                                                  |           |     |                  |                          | g/l         | Blood Lactate |
|                       |                                                  |           |     |                  |                          |             | mmol/l        |
| Rectal Temperature    |                                                  | °C        |     | Respiratory Rate |                          | breaths/min |               |

Please circle answers as appropriate. If an answer is unknown, please leave the field blank.

## Gastrointestinal System

**Abdominal Distension?** Y / N

**Auscultation** Normal / Increased / Reduced / None

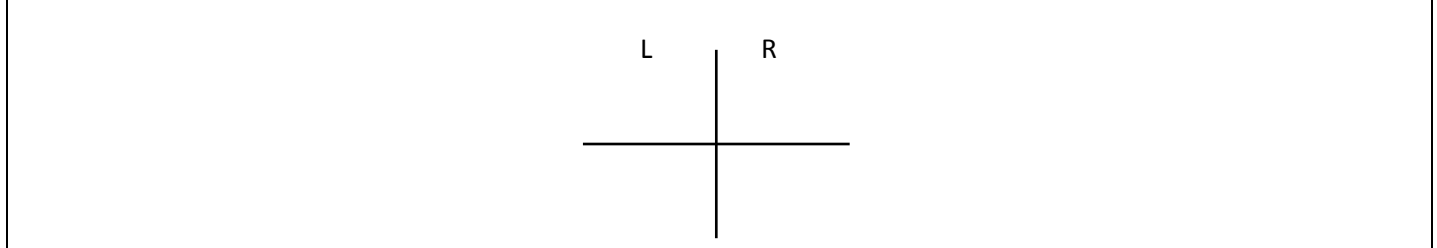

|                             |                           |                           |                           |
|-----------------------------|---------------------------|---------------------------|---------------------------|
| <b>Rectal Exam Findings</b> | Normal rectal findings    | Distended small intestine | Gas distended large colon |
|                             | Large colon impaction     | Small colon distension    | Left dorsal displacement  |
|                             | Right dorsal displacement | Caecal impaction          | Pregnant/Enlarged uterus  |
|                             | Gas distended viscus      | Tight taenia band         | Small intestine impaction |
|                             | Other:                    |                           |                           |

**Nasogastric Tube Passed?** Y / N

*If yes:* **Gastric Reflux?** Y / N

*If yes:* **Gastric Reflux Net Volume**      litres

**Paracentesis Performed?** Y / N

*If yes:* **Gross Appearance** Normal / Turbid / Sanguinous / Blood contaminated / Gut contents / Chylous / No fluid obtained / Other:

|                       |  |                      |                      |  |         |                           |  |        |
|-----------------------|--|----------------------|----------------------|--|---------|---------------------------|--|--------|
| <b>Peritoneal WBC</b> |  | $\times 10^9$ /litre | <b>Peritoneal TP</b> |  | g/litre | <b>Peritoneal Lactate</b> |  | mmol/l |
|-----------------------|--|----------------------|----------------------|--|---------|---------------------------|--|--------|

**Abdominal Ultrasound Performed?** Y / N

**Ultrasound Findings** Amotile SI / Distended SI / Increased volume of fluid / Colon distension / Unremarkable / Other:

## Initial Management

**Initial Management** Surgical / Medical / Euthanased After Exam

**Provisional Diagnosis**
