# Supplementary material for: Has intravenous lidocaine improved the outcome in horses following surgical management of small intestinal lesions in a UK hospital population?
Source: PubMed Central journal article supplement (PMC4962447; doi:10.1186/s12917-016-0784-7), 2016-07-27

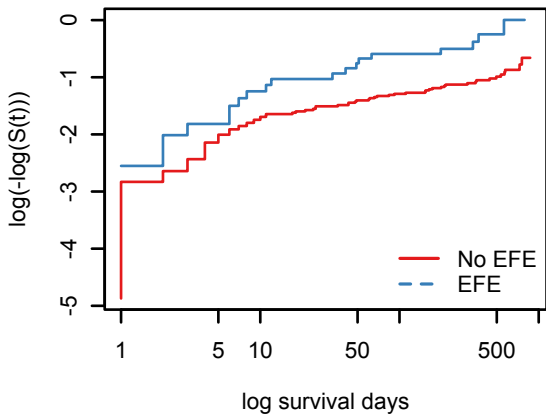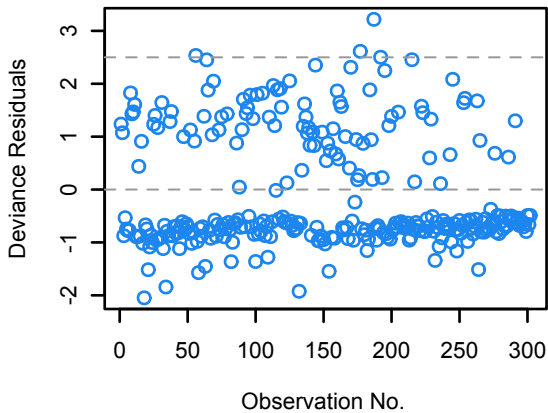

Supplement: 12917_2016_784_MOESM5_ESM.pdf [file 12917_2016_784_MOESM5_ESM.pdf]
